# Supplementary material for: Nano‐LYTACs for Degradation of Membrane Proteins and Inhibition of CD24/Siglec‐10 Signaling Pathway
Source: PubMed Central journal article supplement (PMC10161071; doi:10.1002/advs.202300288), 2023-03-03
Supplement: ADVS-10-2300288-s001.pdf [file ADVS-10-2300288-s001.pdf]

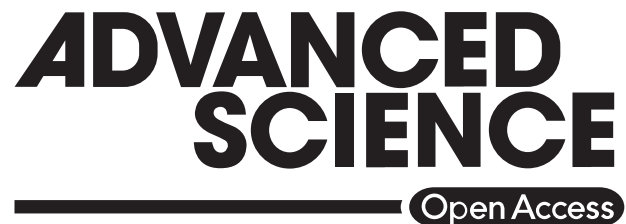

## Supporting Information

for *Adv. Sci.*, DOI 10.1002/adv.202300288

Nano-LYTACs for Degradation of Membrane Proteins and Inhibition of CD24/Siglec-10 Signaling Pathway

*Kun Wang, Albert Yu, Kewei Liu, Chunyan Feng, Yibo Hou, Jiawei Chen, Shaohua Ma\*, Laiqiang Huang\* and Xiaoyong Dai\**

## Supplementary figures and figure legends

A

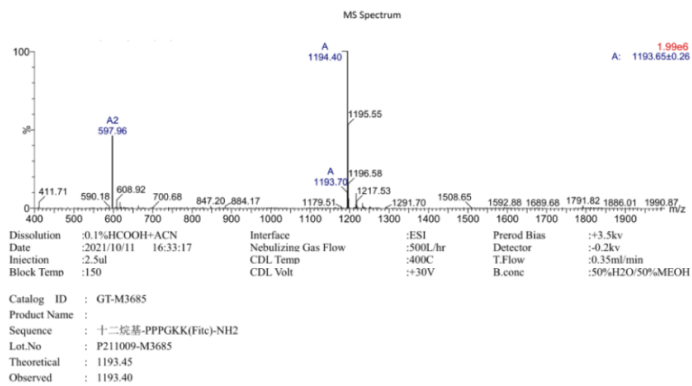

#1 保留时间:0.267(扫描#:17)

峰数:10

质谱:单图 0.267(17) 基峰:214(5167083)

背景:无 段 1 - 事件 1

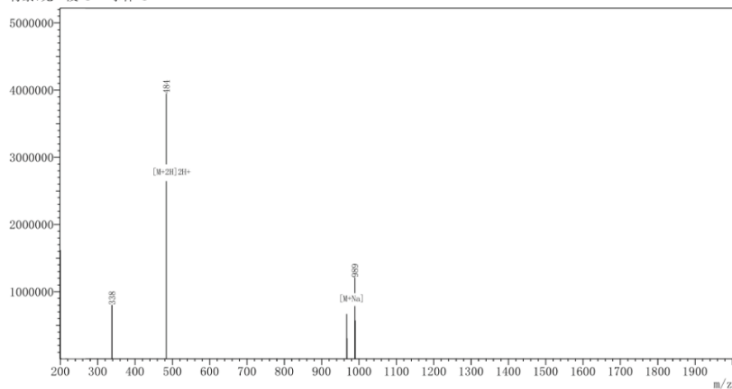

**Supplementary Fig. 1.** Peptide synthesis detection. **A**, MS detection of glycopeptides, Lauryl-P3GKS and Lauryl-P3GKS (GalNAc).

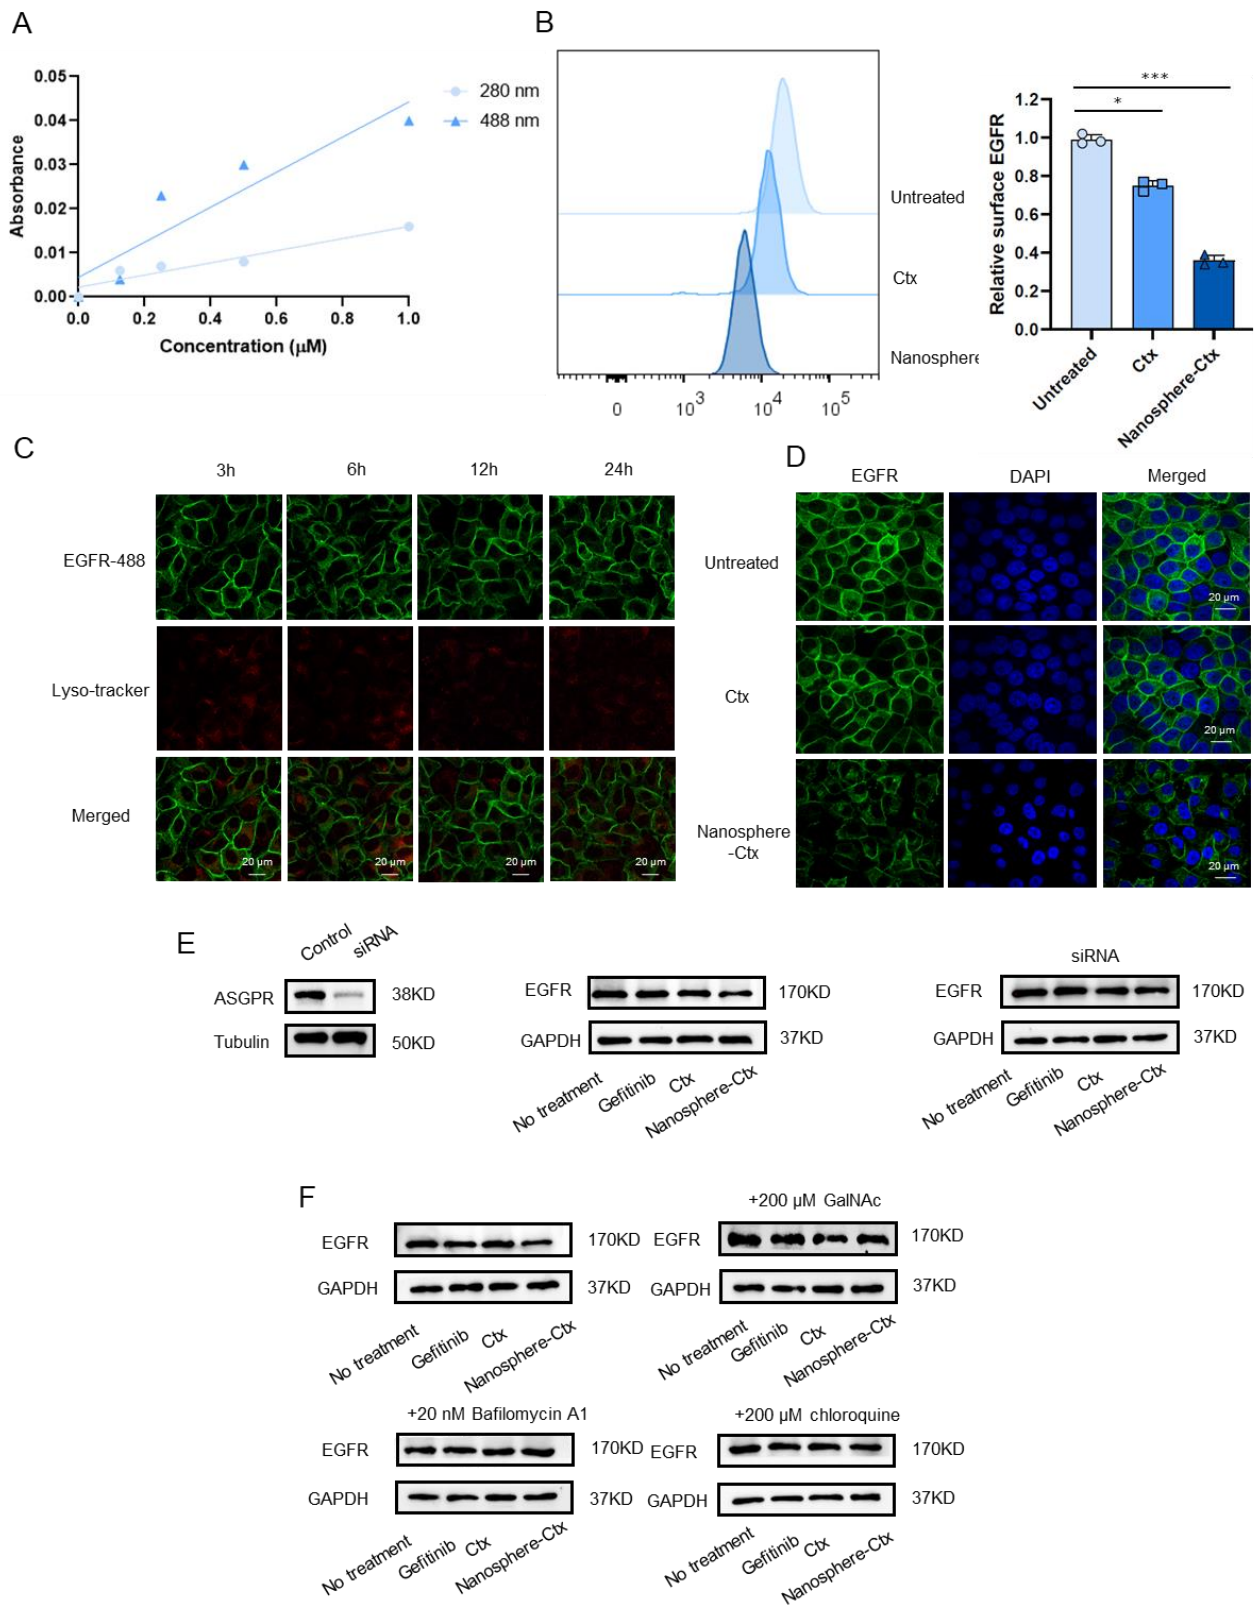

**Supplementary Fig. 2.** Detection of protein degradation. A, Absorbance detection of antibody conjugation. B, Flow cytometer analysis of EGFR expression on Huh7 cell surface before or after

Nanosphere-Ctx treatment. **C**, Visualization of EGFR re-localization in HepG2 cells by confocal microscopy after treatment with 50 nM Ctx for 24 h. **D**, Visualization of EGFR degradation in Huh7 cells by confocal microscopy after 50 nM Ctx conjugate treatments for 24 h. **E**, EGFR levels after treatment with 50 nM Nanosphere-Ctx for 24 h in Huh7 cells expressing a control siRNA targeting ASGPR. **F**, EGFR levels after treatment with 50 nM Nanosphere-Ctx for 24 h in Huh7 cells in the presence of 200  $\mu$ M GalNAc, 20 nM BafilomycinA1 or 200  $\mu$ M chloroquine.

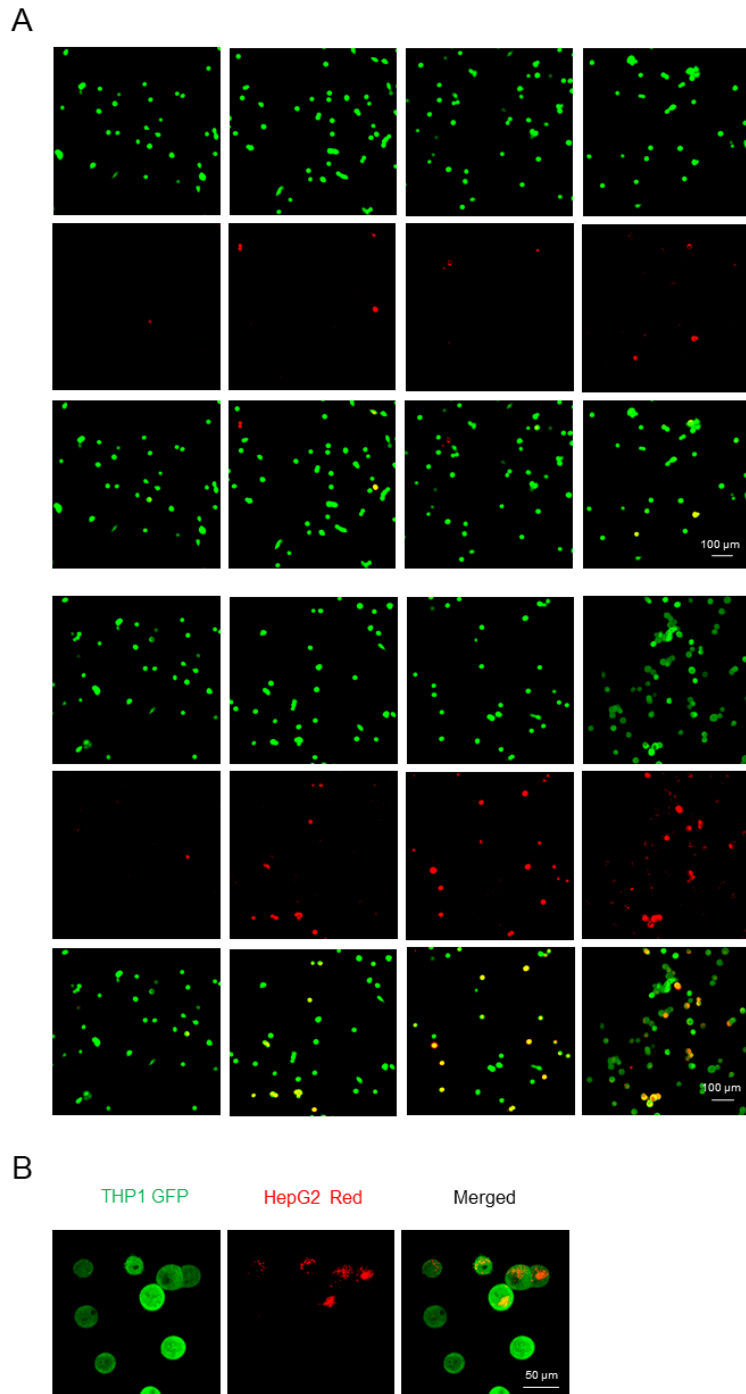

**Supplementary Fig. 3.** Phagocytosis imaging. **A**, Single channel fluorescent images of the phagocytic activity of THP1 GFP<sup>+</sup> cells on HepG2 Red<sup>+</sup> cells treated with 100 nM Nanosphere-AntiCD24 for 24 h. **B**, Representative images collected from high-resolution confocal fluorescence microscopy of macrophage phagocytosis demonstrating engulfment of whole HepG2 cells (mCherry<sup>+</sup>, Red) by Thp1 (Calcein, AM; green).

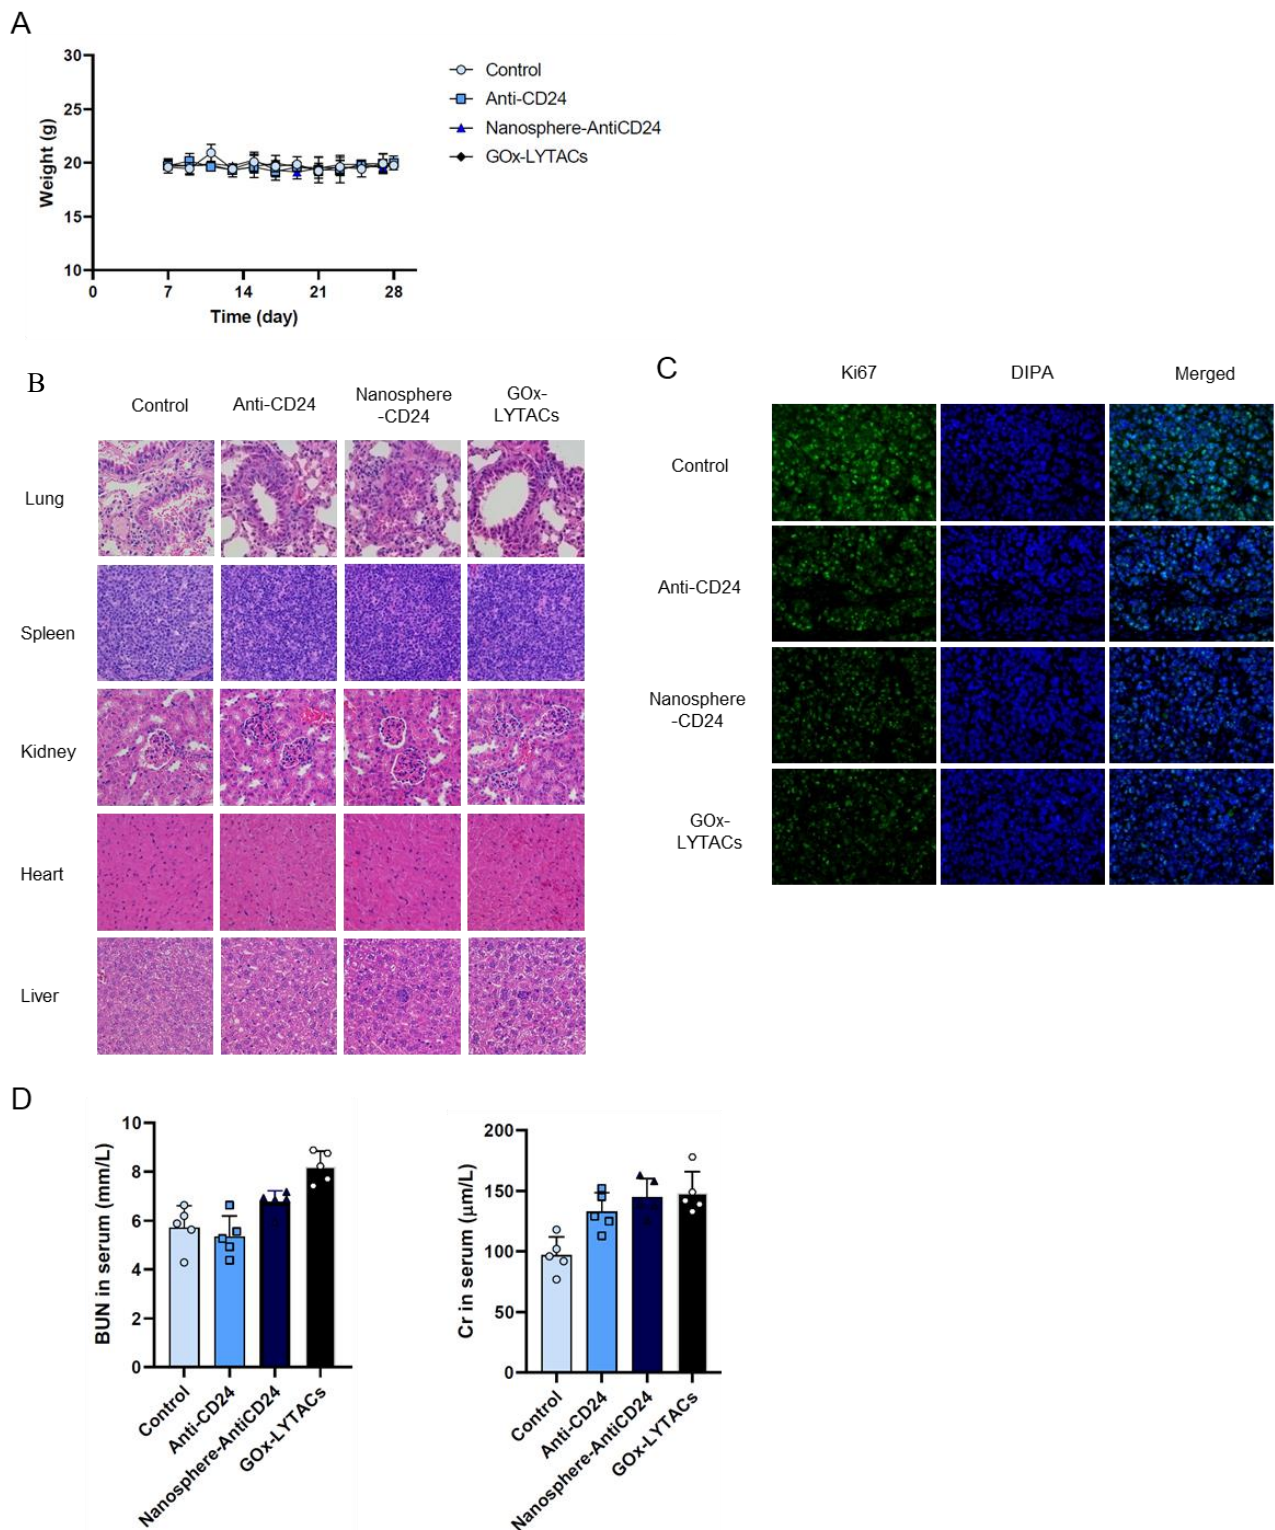

**Supplementary Fig. 4.** Toxicity test of GO<sub>x</sub>-LYTACs *in vivo*. **A**, Changes of body weight of mice injected with HepG2 cells. **B**, Immunohistochemistry of Heart, Liver, Spleen, Lung and Kidney treated with 100 ug/kg Anti-CD24, Nanosphere-AntiCD24, GO<sub>x</sub>-LYTACs for 14 Days. **C**, Immunofluorescence of tumor samples, Ki67 (green) and Cell nuclei (blue). **D**, Concentration of creatinine and Blood urea nitrogen in serum of mice injected with GO<sub>x</sub>-LYTACs.
